# Supplementary material for: Polymerization induced self-assembly: tuning of morphology using ionic strength and pH
Source: Royal Society of Chemistry journal article supplement (doi:10.1039/c7py00552k), 2017-01-01
Supplement: c7py00552k1.pdf [file c7py00552k1.pdf]

## SUPPORTING INFORMATION

# Polymerization Induced Self-Assembly: Tuning of Morphology using Ionic Strength and pH

Dewen Zhou,<sup>1</sup> Siming Dong,<sup>1</sup> Rhiannon P. Kuchel,<sup>2</sup> Sebastien Perrier,<sup>3,4</sup> Per B. Zetterlund<sup>1,\*</sup>

<sup>1</sup> Centre for Advanced Macromolecular Design (CAMD), School of Chemical Engineering, The University of New South Wales, Sydney, NSW 2052, Australia  
Tel: +61 2 9385 4331; Fax: +61 2 9385 6250; E-mail: p.zetterlund@unsw.edu.au

<sup>2</sup> Mark Wainwright Analytical Centre, University of New South Wales, Sydney, NSW 2052, Australia.

<sup>3</sup> Department of Chemistry, The University of Warwick, Gibbet Hill, Coventry, CV4 7AL, United Kingdom

<sup>4</sup> Faculty of Pharmacy and Pharmaceutical Sciences, Monash University, 381 Royal Parade, Parkville, VIC 3052, Australia

\* Corresponding author

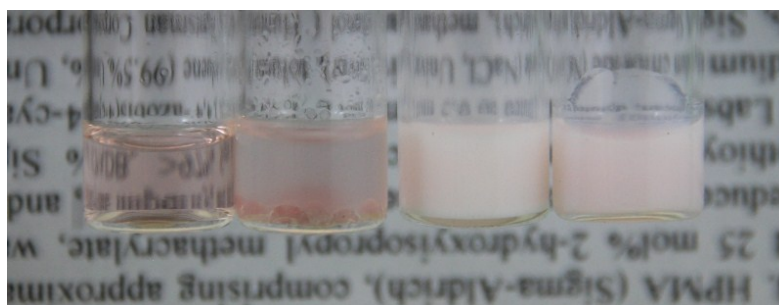

**Fig. S1** Digital photos of system before polymerization in (a) methanol/water (b) water, and after 2 h polymerization in (c) methanol/water co-solvent and (d) water

**Table S1** Molecular and morphological characterization of P(DEAEMA<sub>30-co</sub>-PEGMA<sub>7</sub>)-b-  
 PHPMA<sub>450</sub> block copolymers prepared by RAFT dispersion polymerisation in  
 water/methanol (4:1) at 60 °C.

| Ionic strength<br>$\mu$ /M | pH | $M_n$  | GPC $\bar{D}$ | Z-Average<br>d/nm | Intensity<br>Mean d/nm | DLS Pdl | $\alpha$ % | morphology     |
|----------------------------|----|--------|---------------|-------------------|------------------------|---------|------------|----------------|
| 0.023                      | 3  | 165500 | 1.27          | 56                | 66                     | 0.14    | 98         | spheres        |
| 0.022                      | 4  | 169500 | 1.22          | 55                | 64                     | 0.13    | 97         | spheres        |
| 0.022                      | 5  | 173400 | 1.19          | 55                | 66                     | 0.17    | 99         | spheres        |
| 0.021                      | 6  | 164200 | 1.22          | 58                | 69                     | 0.15    | 97         | spheres        |
| 0.020                      | 7  | 173300 | 1.21          | 63                | 73                     | 0.13    | 96         | spheres        |
| 0.123                      | 3  | 185200 | 1.44          | 89                | 93                     | 0.03    | 97         | spheres        |
| 0.122                      | 4  | 180000 | 1.27          | 82                | 87                     | 0.04    | 97         | spheres        |
| 0.122                      | 5  | 173300 | 1.23          | 75                | 80                     | 0.04    | 98         | spheres        |
| 0.121                      | 6  | 162100 | 1.23          | 74                | 80                     | 0.06    | 95         | spheres        |
| 0.120                      | 7  | 166500 | 1.24          | 102               | 111                    | 0.08    | 96         | spheres        |
| 0.223                      | 3  | 170400 | 1.27          | 137               | 147                    | 0.05    | 98         | spheres        |
| 0.222                      | 4  | 176500 | 1.22          | 95                | 102                    | 0.06    | 98         | spheres        |
| 0.222                      | 5  | 152800 | 1.34          | 142               | 156                    | 0.09    | 95         | spheres        |
| 0.221                      | 6  | 167500 | 1.22          | 176               | 203                    | 0.13    | 99         | spheres+ rods  |
| 0.220                      | 7  | 159600 | 1.30          | 455               | 667                    | 0.23    | 95         | rods+ vesicles |
| 0.323                      | 3  | 172400 | 1.24          | 198               | 229                    | 0.16    | 99         | sphere+ rods   |
| 0.322                      | 4  | 170500 | 1.26          | 229               | 265                    | 0.19    | 99         | sphere+ rods   |
| 0.322                      | 5  | 166600 | 1.28          | 225               | 419                    | 0.17    | 98         | sphere+ rods   |
| 0.321                      | 6  | 174400 | 1.22          | 320               | 441                    | 0.21    | 97         | rods           |
| 0.320                      | 7  | 174200 | 1.18          | 440               | 611                    | 0.12    | 98         | rods+ vesicles |
| 0.423                      | 3  | 197000 | 1.18          | 308               | 374                    | 0.17    | 95         | rods           |
| 0.422                      | 4  | 169300 | 1.29          | 270               | 319                    | 0.12    | 96         | spheres+ rods  |
| 0.422                      | 5  | 173700 | 1.23          | 306               | 387                    | 0.18    | 100        | rods           |
| 0.421                      | 6  | 170900 | 1.22          | 352               | 400                    | 0.13    | 95         | rods+ vesicles |
| 0.420                      | 7  | 167000 | 1.27          | 434               | 557                    | 0.19    | 100        | rods+ vesicles |
| 0.523                      | 3  | 160000 | 1.29          | 427               | 519                    | 0.16    | 99         | rods+ vesicles |
| 0.522                      | 4  | 161300 | 1.29          | 376               | 490                    | 0.19    | 94         | rods+ vesicles |
| 0.522                      | 5  | 160600 | 1.24          | 338               | 423                    | 0.17    | 98         | rods+ vesicles |
| 0.521                      | 6  | 155800 | 1.28          | 356               | 502                    | 0.21    | 97         | rods+ vesicles |
| 0.520                      | 7  | 158400 | 1.31          | 398               | 435                    | 0.12    | 98         | rods+ vesicles |

All these entries were used to construct the phase diagram shown in figure 5

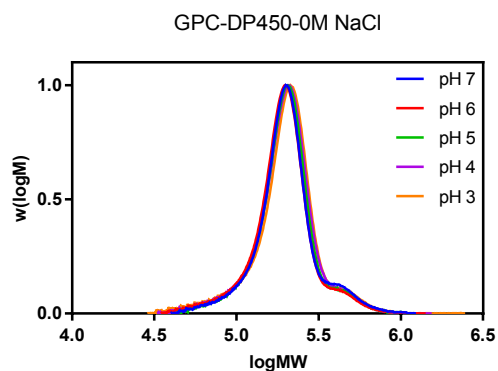

**Fig. S2** DMAc gel permeation chromatograms obtained for a series of PDEAEMA<sub>30</sub>-*co*-PEGMA<sub>7</sub>-*b*-PHPMA<sub>450</sub> at pH = 3-7.

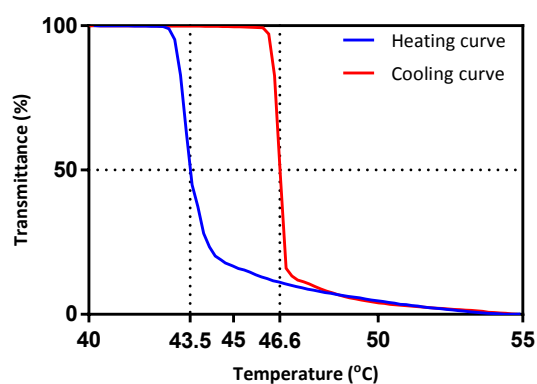

**Fig. S3** Turbidity curves of P(DEAEMA<sub>30</sub>-*stat*-PEGMA<sub>7</sub>) macroRAFT.

LCST behaviour of P(DEAEMA<sub>30</sub>-*stat*-PEGMA<sub>7</sub>) was performed using a Varian Cary 300 Scan spectrophotometer equipped with a Cary temperature controller and a Peltier heating element in a quartz cuvette of 10 mm path length at wavelength of 510 nm. Heating and cooling rates were 1.0 °C/min. The cloud point was determined as the average temperature corresponding to 50% transmittance.
